# Supplementary material
Source: PubMed Central journal article supplement (PMC6287870)
Supplement: ASN.2018030263SupplementaryData1.pdf [file ASN.2018030263SupplementaryData1.pdf]

## Supplemental Table of Contents

Online Table 1. Average systolic and diastolic blood pressure (mmHg) by age periods in MAP trajectory groups

Online Table 2. Average systolic and diastolic blood pressure (mmHg) by age periods in DBP trajectory groups

Online Table 3. Demographic characteristics and cardiovascular risk factors by DBP trajectory group

Online Table 4. Demographic characteristics and cardiovascular risk factors by MAP trajectory group

Online Table 5. Characteristics in SBP, DBP and BMI by SBP trajectories

Online Table 6. Characteristics in SBP, DBP, and BMI by DBP trajectories

Online Table 7. Characteristics in SBP, DBP and BMI by MAP trajectories

Online Table 8. Pearson correlation coefficients between BMI and BP

Online Table 9. Comparison of eGFR(mL/min/1.73m<sup>2</sup>) in the different groups

Online Table 10. Number and percentage of subjects with subclinical renal damage in BP trajectory groups

Online Figure 1. Percentage of SBP trajectories by DBP and MAP trajectory groups

Online Figure 2. Percentage of DBP trajectories by SBP and MAP trajectory groups (A) and the percentage of MAP trajectories by SBP and DBP trajectory

Online Figure 3. Trajectories in SBP(A), DBP(B) and MAP(C) in the Hanzhong Adolescent Hypertension Cohort (sensitivity analysis)

**Online Table 1. Average systolic and diastolic blood pressure (mmHg) by age periods in MAP trajectory groups**

| N, %            | SBP(mmHg)  |                 |             |                     | DBP(mmHg)  |                 |             |                     |
|-----------------|------------|-----------------|-------------|---------------------|------------|-----------------|-------------|---------------------|
|                 | Low-Stable | Moderate-Stable | High-Stable | Moderate-Increasing | Low-Stable | Moderate-Stable | High-Stable | Moderate-Increasing |
|                 | 905(37.2%) | 1155(47.5%)     | 214(8.8%)   | 156(6.4%)           | 905(37.2%) | 1155(47.5%)     | 214(8.8%)   | 156(6.4%)           |
| <b>6-10(Y)</b>  | 98.1±8.2   | 100.6±8.4       | 108.2±9.4   | 104.8±8.5           | 61.6±8.0   | 63.6±8.0        | 70.9±8.0    | 68.7±8.4            |
| <b>11-15(Y)</b> | 100.8±9.3  | 104.4±9.9       | 113.4±9.2   | 106.7±9.4           | 62.6±8.2   | 65.6±8.1        | 73.2±8.1    | 67.4±8.7            |
| <b>16-20(Y)</b> | 109.8±10.4 | 117.1±11.0      | 127.9±11.3  | 118.9±11.0          | 67.0±7.9   | 72.0±8.5        | 79.8±8.7    | 74.0±8.2            |
| <b>21-25(Y)</b> | 112.3±10.9 | 120.3±10.9      | 131.7±11.6  | 126.9±13.3          | 69.6±8.3   | 74.9±7.8        | 83.1±8.3    | 78.3±8.5            |
| <b>26-30(Y)</b> | 110.2±8.2  | 120.9±6.9       | 136.5±6.8   | 128.0±7.4           | 70.1±6.4   | 77.2±8.1        | 85.0±8.6    | 87.0±8.3            |
| <b>31-35(Y)</b> | 108.2±10.4 | 122.6±9.8       | 134.2±9.5   | 144.5±10.7          | 71.1±7.7   | 82.2±8.2        | 90.2±8.2    | 102.7±8.8           |
| <b>36-40(Y)</b> | 110.2±10.0 | 123.4±10.7      | 134.4±11.7  | 153.3±19.0          | 70.4±7.6   | 81.0±8.4        | 88.9±8.6    | 104.1±11.0          |
| <b>41-45(Y)</b> | 111.6±10.4 | 125.1±11.5      | 134.2±11.3  | 155.3±18.5          | 69.4±7.3   | 80.1±8.7        | 87.7±8.4    | 102.1±10.8          |

**Online Table 2. Average systolic and diastolic blood pressure (mmHg) by age periods in DBP trajectory groups**

| N, %            | SBP(mmHg)   |                 |                |                     | DBP(mmHg)   |                 |                |                     |
|-----------------|-------------|-----------------|----------------|---------------------|-------------|-----------------|----------------|---------------------|
|                 | Low-Stable  | Moderate-Stable | Low-Increasing | Moderate-Increasing | Low-Stable  | Moderate-Stable | Low-Increasing | Moderate-Increasing |
|                 | 1165(47.9%) | 628(25.8%)      | 465(19.1%)     | 172(7.1%)           | 1165(47.9%) | 628(25.8%)      | 465(19.1%)     | 172(7.1%)           |
| <b>6-10(Y)</b>  | 98.5±8.3    | 104.0±9.0       | 98.7±8.3       | 105.0±8.5           | 61.6±7.8    | 68.4±7.4        | 60.2±7.7       | 69.3±8.8            |
| <b>11-15(Y)</b> | 101.8±9.6   | 108.8±9.8       | 101.6±9.8      | 108.0±9.6           | 63.1±8.0    | 70.9±7.7        | 61.4±7.4       | 69.4±8.1            |
| <b>16-20(Y)</b> | 111.9±11.2  | 121.3±11.5      | 114.6±11.3     | 121.0±11.1          | 67.7±7.8    | 77.2±8.2        | 68.5±7.8       | 76.7±8.8            |
| <b>21-25(Y)</b> | 114.5±11.6  | 123.9±11.9      | 119.7±11.6     | 127.7±13.1          | 70.1±8.1    | 79.5±7.7        | 73.7±7.4       | 80.9±8.5            |
| <b>26-30(Y)</b> | 112.8±9.2   | 127.7±11.4      | 122.9±7.8      | 134.7±5.9           | 70.6±6.4    | 81.9±8.8        | 79.0±8.7       | 88.3±5.2            |
| <b>31-35(Y)</b> | 111.3±11.3  | 122.9±12.6      | 125.2±9.7      | 141.8±10.3          | 72.3±7.6    | 83.1±8.8        | 85.7±7.1       | 101.5±7.8           |
| <b>36-40(Y)</b> | 112.7±10.7  | 124.1±12.0      | 128.3±12.3     | 150.6±19.3          | 71.6±7.8    | 81.3±8.4        | 86.3±7.8       | 103.5±10.7          |
| <b>41-45(Y)</b> | 114.4±12.0  | 125.1±11.5      | 131.0±14.3     | 151.8±18.6          | 70.9±8.2    | 80.5±8.5        | 85.0±8.7       | 102.1±10.4          |

**Online Table 3. Demographic characteristics and cardiovascular risk factors by DBP trajectory group**

| Parameter                             | Total, N | Low-Stable          | Moderate-Stable     | High-Stable         | Moderate-Increasing | P value |
|---------------------------------------|----------|---------------------|---------------------|---------------------|---------------------|---------|
| <b>Male, %</b>                        | 1378     | 508(43.61%)         | 383(60.99%)         | 362(77.85%)         | 125(72.67%)         | < 0.001 |
| <b>Age in 1987(Y)</b>                 | 2430     | 11(9,14)            | 12(9,14)            | 13(10,14)           | 11(9,14)            | < 0.001 |
| <b>Bust in 1987(cm)</b>               | 2421     | 60.0(55.3,66.0)     | 61.5(58.0,68.0)     | 62.2(58.0,68.0)     | 61.0(58.2,69.0)     | < 0.001 |
| <b>HR in 1987(Times/min)</b>          | 2425     | 78(72,84)           | 80(72,84)           | 78(72,84)           | 80(72,84)           | 0.0008  |
| <b>HR in 2017(Times/min)</b>          | 1907     | 72(65,79)           | 74(67,80)           | 75(68,82)           | 76(69,85)           | 0.0092  |
| <b>BMI in 1987 (kg/m<sup>2</sup>)</b> | 2419     | 15.6(14.6,17.3)     | 16.0(14.8,17.7)     | 16.0(14.9,17.3)     | 16.0(15.0,17.8)     | 0.0001  |
| <b>BMI in 2017 (kg/m<sup>2</sup>)</b> | 1904     | 23.0(21.2,24.8)     | 24.1(22.3,26.3)     | 25.1(22.8,27.3)     | 26.0(23.6,28.8)     | < 0.001 |
| <b>WHR in 2017(m)</b>                 | 1901     |                     |                     |                     |                     |         |
| Male                                  | 1097     | 0.923±0.057         | 0.942±0.060         | 0.957±0.063         | 0.980±0.056         | < 0.001 |
| Female                                | 804      | 0.880±0.063         | 0.888±0.062         | 0.899±0.056         | 0.909±0.065         | 0.0057  |
| <b>Occupation,%</b>                   | 2170     |                     |                     |                     |                     | 0.2369  |
| Farmer                                | 871      | 418(41.02%)         | 228(40.35%)         | 161(37.97%)         | 64(39.51%)          |         |
| Worker                                | 424      | 174(17.08%)         | 115(20.35%)         | 98(23.11%)          | 37(22.84%)          |         |
| Businessman                           | 173      | 88(8.64%)           | 34(6.02%)           | 36(8.49%)           | 15(9.26%)           |         |
| Governor                              | 71       | 30(2.94%)           | 20(3.54%)           | 14(3.30%)           | 7(4.32%)            |         |
| Other                                 | 631      | 309(30.32%)         | 168(29.73%)         | 115(27.12%)         | 39(24.07%)          |         |
| <b>Education,%</b>                    | 2206     |                     |                     |                     |                     | 0.0711  |
| Primary School or Less                | 179      | 73(6.99%)           | 56(9.91%)           | 44(10.14%)          | 6(3.70%)            |         |
| Middle School                         | 1328     | 632(60.48%)         | 323(57.17%)         | 272(62.67%)         | 101(62.35%)         |         |
| High School                           | 504      | 243(23.25%)         | 136(24.07%)         | 83(19.12%)          | 42(25.93%)          |         |
| College or More                       | 195      | 97(9.28%)           | 50(8.85%)           | 35(8.06%)           | 13(8.02%)           |         |
| <b>Marital Status,%</b>               | 2255     |                     |                     |                     |                     | 0.9919  |
| Married                               | 2162     | 1020(95.77%)        | 558(96.04%)         | 426(96.16%)         | 158(95.18%)         |         |
| Divorced                              | 46       | 23(2.16%)           | 10(1.72%)           | 9(2.03%)            | 4(2.41%)            |         |
| Unmarried or Other                    | 47       | 22(2.07%)           | 13(2.24%)           | 8(1.81%)            | 4(2.41%)            |         |
| <b>Smoking,%</b>                      | 1908     | 330(36.34%)         | 228(45.60%)         | 219(59.19%)         | 83(63.36%)          | < 0.001 |
| <b>Drinking,%</b>                     | 1908     | 216(23.81%)         | 155(31.00%)         | 156(42.16%)         | 48(36.64%)          | < 0.001 |
| <b>Hypertension,%</b>                 | 1908     | 18(1.98%)           | 55(11.00%)          | 55(14.86%)          | 86(65.65%)          | < 0.001 |
| <b>Diabetes,%</b>                     | 1908     | 15(1.65%)           | 18(3.60%)           | 12(3.24%)           | 9(6.92%)            | 0.0032  |
| <b>Hyperlipidemia,%</b>               | 1908     | 50(5.51%)           | 57(11.40%)          | 41(11.08%)          | 21(16.03%)          | < 0.001 |
| <b>GLU(mmol/L)</b>                    | 1730     | 4.51(4.24,4.82)     | 4.60(4.28,4.95)     | 4.64(4.34,4.98)     | 4.73(4.38,5.10)     | < 0.001 |
| <b>TC(mmol/L)</b>                     | 1732     | 4.44(4.01,4.90)     | 4.49(4.02,5.04)     | 4.55(4.12,5.17)     | 4.65(4.18,5.16)     | 0.0015  |
| <b>Triglycerides(mmol/L)</b>          | 1732     | 1.21(0.89,1.70)     | 1.31(0.94,1.93)     | 1.62(1.15,2.35)     | 1.67(1.16,2.27)     | < 0.001 |
| <b>LDL-C(mmol/L)</b>                  | 1732     | 2.46(2.11,2.80)     | 2.50(2.11,2.88)     | 2.58(2.19,3.02)     | 2.62(2.28,3.06)     | 0.0004  |
| <b>HDL-C(mmol/L)</b>                  | 1732     | 1.19(1.03,1.37)     | 1.15(0.97,1.34)     | 1.07(0.93,1.21)     | 1.06(0.93,1.21)     | < 0.001 |
| <b>Serum uric acid(umol/L)</b>        | 1732     | 262.1(213.6,312.8)  | 285.0(227.9,337.4)  | 309.1(265.0,367.2)  | 325.4(261.5,379.4)  | < 0.001 |
| <b>Urine uric acid(umol/L)</b>        | 1671     | 1295(926,1975)      | 1296(925,2047)      | 1289(975,2039)      | 1541(1094,2333)     | 0.0342  |
| <b>Serum creatinine(umol/L)</b>       | 1669     | 72.55(64.40,83.30)  | 76.85(68.23,87.10)  | 79.80(71.10,89.20)  | 79.10(70.60,87.45)  | < 0.001 |
| <b>Urine albumin(mg/L)</b>            | 1671     | 6.30(3.50,11.40)    | 7.85(3.80,12.70)    | 10.20(5.15,19.20)   | 14.75(7.60,49.70)   | < 0.001 |
| <b>eGFR(mL/min/1.73m<sup>2</sup>)</b> | 1732     | 98.61(88.63,112.21) | 96.86(85.70,110.30) | 96.08(86.92,109.04) | 95.04(87.28,111.22) | 0.1518  |
| <b>uACR(mg/ mmol)</b>                 | 1669     | 0.872(0.583,1.463)  | 0.990(0.621,1.653)  | 1.134(0.696,2.134)  | 2.233(0.930,4.802)  | < 0.001 |

HR, Heart rate ; BMI, Body mass index; WHR, Waist to hip ratio ; GLU, fasting blood glucose; TC, Total cholesterol ; LDL-C, low-density lipoproteins cholesterol; HDL-C, high-density lipoproteins cholesterol; eGFR, estimated glomerular filtration rate; uACR, urinary albumin to creatinine ratio(mg/mmol).

**Online Table 4. Demographic characteristics and cardiovascular risk factors by MAP trajectory group**

| Parameter                             | Total, N | Low-Stable          | Moderate-Stable     | High-Stable         | Moderate-Increasing | P value |
|---------------------------------------|----------|---------------------|---------------------|---------------------|---------------------|---------|
| <b>Male, %</b>                        | 1378     | 341(37.68%)         | 768(66.49%)         | 155(72.43%)         | 114(73.08%)         | < 0.001 |
| <b>Age in 1987(Y)</b>                 | 2430     | 11(9,14)            | 12(9,14)            | 11(10,14)           | 12(10,14)           | 0.0002  |
| <b>Bust in 1987(cm)</b>               | 2421     | 60.0(55.0,65.8)     | 61.0(57.0,68.0)     | 62.0(59.0,68.0)     | 63.3(60.0,70.0)     | < 0.001 |
| <b>HR in 1987(Times/min)</b>          | 2425     | 78(72,84)           | 78(72,84)           | 80(73.5,84)         | 78(72,84)           | 0.0479  |
| <b>HR in 2017(Times/min)</b>          | 1907     | 72(66,79)           | 74(67,80)           | 75(68,82)           | 76(68,84)           | 0.0092  |
| <b>BMI in 1987 (kg/m<sup>2</sup>)</b> | 2419     | 15.6(14.4,17.3)     | 15.9(14.8,17.5)     | 16.1(15.1,17.7)     | 16.2(15.0,17.9)     | < 0.001 |
| <b>BMI in 2017 (kg/m<sup>2</sup>)</b> | 1904     | 22.8(21.1,24.6)     | 24.0(22.2,26.4)     | 25.3(23.3,26.8)     | 26.1(23.9,29.0)     | < 0.001 |
| <b>WHR in 2017(m)</b>                 | 1901     |                     |                     |                     |                     |         |
| Male                                  | 1097     | 0.923±0.058         | 0.942±0.062         | 0.958±0.051         | 0.986±0.062         | < 0.001 |
| Female                                | 804      | 0.878±0.062         | 0.890±0.065         | 0.900±0.053         | 0.912±0.060         | 0.0021  |
| <b>Occupation,%</b>                   | 2170     |                     |                     |                     |                     | 0.3260  |
| Farmer                                | 871      | 327(41.08%)         | 412(39.81%)         | 72(37.50%)          | 60(40.82%)          |         |
| Worker                                | 424      | 136(17.09%)         | 204(19.71%)         | 51(26.56%)          | 33(22.45%)          |         |
| Businessman                           | 173      | 69(8.67%)           | 80(7.73%)           | 13(6.77%)           | 11(7.48%)           |         |
| Governor                              | 71       | 22(2.76%)           | 35(3.38%)           | 7(3.65%)            | 7(4.76%)            |         |
| Other                                 | 631      | 242(30.40%)         | 304(29.37%)         | 49(25.52%)          | 36(24.49%)          |         |
| <b>Education,%</b>                    | 2206     |                     |                     |                     |                     | 0.0691  |
| Primary School or Less                | 179      | 53(6.47%)           | 99(9.45%)           | 18(9.38%)           | 9(6.12%)            |         |
| Middle School                         | 1328     | 485(59.22%)         | 636(60.69%)         | 108(56.25%)         | 99(67.35%)          |         |
| High School                           | 504      | 196(23.93%)         | 225(21.47%)         | 52(27.08%)          | 31(21.09%)          |         |
| College or More                       | 195      | 85(10.38%)          | 88(8.40%)           | 14(7.29%)           | 8(5.44%)            |         |
| <b>Marital Status,%</b>               | 2255     |                     |                     |                     |                     | 0.6486  |
| Married                               | 2162     | 804(96.52%)         | 1025(95.35%)        | 190(96.94%)         | 143(94.70%)         |         |
| Divorced                              | 46       | 17(2.04%)           | 22(2.05%)           | 3(1.53%)            | 4(2.65%)            |         |
| Unmarried or Other                    | 47       | 12(1.44%)           | 28(2.60%)           | 3(1.53%)            | 4(2.65%)            |         |
| <b>Smoking,%</b>                      | 1908     | 224(31.11%)         | 470(52.51%)         | 91(52.30%)          | 75(62.50%)          | < 0.001 |
| <b>Drinking,%</b>                     | 1908     | 143(19.89%)         | 325(36.31%)         | 56(32.18%)          | 51(42.50%)          | < 0.001 |
| <b>Hypertension,%</b>                 | 1908     | 10(1.39%)           | 65(7.26%)           | 56(32.18%)          | 83(69.17%)          | < 0.001 |
| <b>Diabetes,%</b>                     | 1908     | 12(1.67%)           | 28(3.13%)           | 6(3.45%)            | 8(6.72%)            | 0.0139  |
| <b>Hyperlipidemia,%</b>               | 1908     | 36(5.01%)           | 92(10.28%)          | 21(12.07%)          | 20(16.67%)          | < 0.001 |
| <b>GLU(mmol/L)</b>                    | 1730     | 4.51(4.23,4.80)     | 4.60(4.31,4.95)     | 4.64(4.29,5.01)     | 4.74(4.38,5.13)     | < 0.001 |
| <b>TC(mmol/L)</b>                     | 1732     | 4.43(3.98,4.89)     | 4.52(4.06,5.05)     | 4.54(4.10,5.03)     | 4.58(4.07,5.18)     | 0.0195  |
| <b>Triglycerides(mmol/L)</b>          | 1732     | 1.18(0.88,1.69)     | 1.41(0.99,2.09)     | 1.51(1.03,2.05)     | 1.69(1.23,2.28)     | < 0.001 |
| <b>LDL-C(mmol/L)</b>                  | 1732     | 2.44(2.08,2.78)     | 2.53(2.16,2.97)     | 2.55(2.18,2.96)     | 2.56(2.20,3.01)     | 0.0013  |
| <b>HDL-C(mmol/L)</b>                  | 1732     | 1.20(1.05,1.38)     | 1.12(0.95,1.30)     | 1.11(0.97,1.28)     | 1.05(0.93,1.19)     | < 0.001 |
| <b>Serum uric acid(umol/L)</b>        | 1732     | 252.1(209.2,303.2)  | 292.9(242.2,344.7)  | 307.8(250.9,352.7)  | 325.3(260.7,379.5)  | < 0.001 |
| <b>Urine uric acid(umol/L)</b>        | 1671     | 1282(910,1926)      | 1316(962,2082)      | 1303(918,2104)      | 1525(1089,2112)     | 0.0551  |
| <b>Serum creatinine(umol/L)</b>       | 1669     | 71.15(63.58,82.60)  | 78.50(69.45,87.40)  | 78.20(70.83,90.05)  | 78.95(69.40,87.38)  | < 0.001 |
| <b>Urine albumin(mg/L)</b>            | 1671     | 6.10(3.30,11.30)    | 8.10(4.50,14.10)    | 9.40(5.00,21.50)    | 14.90(7.50,51.10)   | < 0.001 |
| <b>eGFR(mL/min/1.73m<sup>2</sup>)</b> | 1732     | 98.93(88.95,113.14) | 96.65(87.00,109.18) | 95.73(84.69,110.84) | 95.42(86.16,111.32) | 0.0376  |
| <b>uACR(mg/ mmol)</b>                 | 1669     | 0.868(0.583,1.398)  | 0.990(0.635,1.670)  | 1.195(0.716,2.572)  | 2.323(0.988,4.197)  | < 0.001 |

HR, Heart rate ; BMI, Body mass index; WHR, Waist to hip ratio ; GLU, fasting blood glucose; TC, Total cholesterol ; LDL-C, low-density lipoproteins cholesterol; HDL-C, high-density lipoproteins cholesterol; eGFR, estimated glomerular filtration rate; uACR, urinary albumin to creatinine ratio(mg/mmol)..

**Online Table 5. Characteristics in SBP,DBP and BMI by SBP trajectories**

| <b>Group</b>                           | <b>Low-Stable</b> | <b>Moderate-Stable</b> | <b>High-Stable</b> | <b>Moderate-Increasing</b> | <b>P value</b> |
|----------------------------------------|-------------------|------------------------|--------------------|----------------------------|----------------|
| <b>Prepuberty (6–11 y)</b>             |                   |                        |                    |                            |                |
| Age (Y)                                | 9(8,10)           | 9(8,10)                | 9(8,11)            | 10(8,11)                   | 0.7726         |
| SBP (mmHg)                             | 99.5±9.2          | 102.4±9.1              | 107.0±9.6          | 106.2±11.4                 | < 0.001        |
| DBP (mmHg)                             | 63.1±8.1          | 64.6±8.7               | 69.2±8.6           | 68.1±10.8                  | < 0.001        |
| BMI (kg/m <sup>2</sup> )               | 15.1±1.9          | 15.3±2.1               | 15.6±1.6           | 15.8±2.3                   | 0.0124         |
| <b>Puberty (12–19 y)</b>               |                   |                        |                    |                            |                |
| Age (Y)                                | 13(12,14)         | 13(12,14)              | 13(13,14)          | 13(13,14)                  | 0.4193         |
| SBP (mmHg)                             | 101.7±10.8        | 105.4±10.3             | 110.6±10.9         | 106.6±11.3                 | < 0.001        |
| DBP (mmHg)                             | 63.6±8.6          | 65.7±8.5               | 68.8±8.8           | 66.7±8.9                   | < 0.001        |
| BMI (kg/m <sup>2</sup> )               | 17.2±2.5          | 17.3±2.7               | 17.4±2.6           | 17.7±2.9                   | 0.1916         |
| <b>Young adulthood (20–35 y)</b>       |                   |                        |                    |                            |                |
| Age (Y)                                | 22(20,32)         | 22(20,33)              | 22(20,29)          | 22(20,29)                  | 0.8054         |
| SBP (mmHg)                             | 111.3±13.4        | 119.8±12.3             | 128.5±13.6         | 124.3±15.1                 | < 0.001        |
| DBP (mmHg)                             | 72.0±9.5          | 75.7±10.2              | 79.2±11.9          | 79.2±12.0                  | < 0.001        |
| BMI (kg/m <sup>2</sup> )               | 21.3±2.9          | 21.8±3.1               | 22.1±3.2           | 22.2±4.1                   | 0.0015         |
| <b>Middle-aged adulthood (36–45 y)</b> |                   |                        |                    |                            |                |
| Age (Y)                                | 39(37,40)         | 39(37,40)              | 39(37,40)          | 39(37,41)                  | 0.1248         |
| SBP (mmHg)                             | 112.4±14.3        | 121.4±12.2             | 132.5±13.8         | 142.0±22.8                 | < 0.001        |
| DBP (mmHg)                             | 73.4±10.2         | 79.0±10.2              | 86.5±11.2          | 93.8±16.1                  | < 0.001        |
| BMI (kg/m <sup>2</sup> )               | 23.2±3.2          | 24.2±3.4               | 24.8±3.7           | 25.7±4.0                   | < 0.001        |

**Online Table 6. Characteristics in SBP, DBP and BMI by DBP trajectories**

| <b>Group</b>                          | <b>Low-Stable</b> | <b>Moderate-Stable</b> | <b>High-Stable</b> | <b>Moderate-Increasing</b> | <b>P value</b> |
|---------------------------------------|-------------------|------------------------|--------------------|----------------------------|----------------|
| <b>Prepuberty (6–11 y)</b>            |                   |                        |                    |                            |                |
| Age (Y)                               | 9(8,10)           | 9(8,10)                | 9(8,10)            | 9(8,10)                    | 0.3367         |
| SBP (mmHg)                            | 100.9±9.0         | 105.3±10.0             | 100.2±9.5          | 104.2±10.1                 | < 0.001        |
| DBP (mmHg)                            | 63.2±8.2          | 68.7±8.2               | 62.3±9.1           | 67.8±9.6                   | < 0.001        |
| BMI (kg/m <sup>2</sup> )              | 15.2±1.9          | 15.5±2.3               | 15.3±2.0           | 15.5±1.8                   | 0.0580         |
| <b>Puberty (12–19 y)</b>              |                   |                        |                    |                            |                |
| Age (Y)                               | 13(12,14)         | 13(12,14)              | 13(13,14)          | 13(12,14)                  | 0.1090         |
| SBP (mmHg)                            | 104.0±10.9        | 107.8±10.6             | 102.6±10.5         | 107.8±10.9                 | < 0.001        |
| DBP (mmHg)                            | 64.1±8.5          | 69.3±8.3               | 62.7±7.7           | 68.4±8.7                   | < 0.001        |
| BMI (kg/m <sup>2</sup> )              | 17.3±2.6          | 17.5±2.8               | 17.0±2.4           | 17.7±2.7                   | 0.0044         |
| <b>Young adulthood (20–35 y)</b>      |                   |                        |                    |                            |                |
| Age (Y)                               | 22(21,33)         | 22(20,31)              | 22(20,28)          | 22(20,29)                  | 0.3345         |
| SBP (mmHg)                            | 115.0±14.2        | 122.1±12.5             | 119.8±12.5         | 127.4±14.9                 | < 0.001        |
| DBP (mmHg)                            | 72.5±9.9          | 78.4±9.4               | 75.1±10.3          | 83.5±13.4                  | < 0.001        |
| BMI (kg/m <sup>2</sup> )              | 21.5±2.9          | 21.9±3.0               | 21.5±3.2           | 22.5±4.0                   | 0.0032         |
| <b>Middle-aged adulthood (36–45y)</b> |                   |                        |                    |                            |                |
| Age (Y)                               | 39(37,40)         | 39(37,40)              | 39(38,40)          | 39(37,40)                  | 0.1616         |
| SBP (mmHg)                            | 115.1±13.9        | 123.4±13.3             | 126.2±13.4         | 139.5±20.7                 | < 0.001        |
| DBP (mmHg)                            | 73.7±9.8          | 80.4±9.5               | 84.2±9.6           | 95.4±15.3                  | < 0.001        |
| BMI (kg/m <sup>2</sup> )              | 23.3±3.2          | 24.2±3.6               | 24.9±3.6           | 25.7±3.7                   | < 0.001        |

**Online Table 7. Characteristics in SBP,DBP and BMI by MAP trajectories**

| <b>Group</b>                           | <b>Low-Stable</b> | <b>Moderate-Stable</b> | <b>High-Stable</b> | <b>Moderate-Increasing</b> | <b>P value</b> |
|----------------------------------------|-------------------|------------------------|--------------------|----------------------------|----------------|
| <b>Prepuberty (6–11 y)</b>             |                   |                        |                    |                            |                |
| Age (Y)                                | 9(8,10)           | 9(8,10)                | 9(8,11)            | 9(8,11)                    | 0.4275         |
| SBP (mmHg)                             | 100.8±9.0         | 101.8±9.3              | 109.1±10.3         | 103.7±9.9                  | < 0.001        |
| DBP (mmHg)                             | 63.3±8.0          | 64.5±8.8               | 72.0±8.3           | 66.2±9.9                   | < 0.001        |
| BMI (kg/m <sup>2</sup> )               | 15.1±2.0          | 15.4±2.0               | 15.8±2.4           | 15.6±2.1                   | 0.0026         |
| <b>Puberty (12–19 y)</b>               |                   |                        |                    |                            |                |
| Age (Y)                                | 13(12,14)         | 13(12,14)              | 13(12,14)          | 14(13,14)                  | 0.3386         |
| SBP (mmHg)                             | 103.2±10.7        | 104.9±10.6             | 111.6±10.2         | 106.7±11.4                 | < 0.001        |
| DBP (mmHg)                             | 63.8±8.8          | 65.5±8.2               | 71.8±8.3           | 66.4±8.6                   | < 0.001        |
| BMI (kg/m <sup>2</sup> )               | 17.2±2.6          | 17.3±2.5               | 17.6±2.8           | 17.7±3.0                   | 0.0877         |
| <b>Young adulthood (20–35 y)</b>       |                   |                        |                    |                            |                |
| Age (Y)                                | 22(21,33)         | 22(20,32)              | 22(20,29)          | 22(20,28)                  | 0.1792         |
| SBP (mmHg)                             | 113.0±14.2        | 120.4±12.0             | 129.0±13.2         | 124.2±15.4                 | < 0.001        |
| DBP (mmHg)                             | 71.8±9.8          | 76.2±10.0              | 81.7±10.6          | 79.5±13.5                  | < 0.001        |
| BMI (kg/m <sup>2</sup> )               | 21.4±3.0          | 21.8±3.1               | 22.3±3.2           | 22.0±3.9                   | 0.0027         |
| <b>Middle-aged adulthood (36–45 y)</b> |                   |                        |                    |                            |                |
| Age (Y)                                | 39(37,40)         | 39(38,40)              | 38(37,40)          | 39(37,40)                  | 0.5479         |
| SBP (mmHg)                             | 113.3±14.0        | 122.8±12.4             | 131.5±14.0         | 140.2±21.5                 | < 0.001        |
| DBP (mmHg)                             | 72.7±10.0         | 80.4±9.4               | 86.4±10.6          | 95.1±15.7                  | < 0.001        |
| BMI (kg/m <sup>2</sup> )               | 23.1±3.1          | 24.4±3.5               | 24.7±3.6           | 25.8±3.9                   | < 0.001        |



**Online Table 8. Pearson Correlation Coefficients Between BMI and BP**

| <b>Group</b>                     | <b>Prepuberty BMI</b> | <b>Puberty BMI</b> | <b>Young adulthood BMI</b> | <b>Middle-aged adulthood BMI</b> |
|----------------------------------|-----------------------|--------------------|----------------------------|----------------------------------|
| <b>Prepuberty SBP</b>            | 0.239*                | ---                | ---                        | ---                              |
| <b>Prepuberty DBP</b>            | 0.157*                | ---                | ---                        | ---                              |
| <b>Prepuberty MAP</b>            | 0.205*                | ---                | ---                        | ---                              |
| <b>Puberty SBP</b>               | ---                   | 0.350*             | ---                        | ---                              |
| <b>Puberty DBP</b>               | ---                   | 0.190*             | ---                        | ---                              |
| <b>Puberty MAP</b>               | ---                   | 0.278*             | ---                        | ---                              |
| <b>Young adulthood SBP</b>       | ---                   | ---                | 0.226*                     | ---                              |
| <b>Young adulthood DBP</b>       | ---                   | ---                | 0.360*                     | ---                              |
| <b>Young adulthood MAP</b>       | ---                   | ---                | 0.334*                     | ---                              |
| <b>Middle-aged adulthood SBP</b> | ---                   | ---                | ---                        | 0.336*                           |
| <b>Middle-aged adulthood DBP</b> | ---                   | ---                | ---                        | 0.333*                           |
| <b>Middle-aged adulthood MAP</b> | ---                   | ---                | ---                        | 0.350*                           |

\* $P < 0.01$ .

**Online Table 9. Comparison of eGFR(mL/min/1.73m<sup>2</sup>) in the different groups**

|                             | <b>Low-Stable</b> | <b>Moderate-Stable</b> | <b>High- Stable<br/>(OR Low-<br/>Increasing)</b> | <b>Moderate-<br/>Increasing</b> | <b>Total</b> |
|-----------------------------|-------------------|------------------------|--------------------------------------------------|---------------------------------|--------------|
| <b>SBP Trajectory Group</b> | 534(30.83%)       | 888(51.27%)            | 216(12.47%)                                      | 94(5.43%)                       | 1732(100%)   |
| eGFR ≥ 90                   | 386(72.28%)       | 615(69.26%)            | 143(66.20%)                                      | 63(67.02%)                      | 1207(69.69%) |
| 60 ≤ eGFR < 90              | 145(27.15%)       | 267(30.07%)            | 72(33.33%)                                       | 30(31.91%)                      | 514(29.68%)  |
| 30 ≤ eGFR < 60              | 3(0.56%)          | 6(0.68%)               | 1(0.46%)                                         | 1(1.06%)                        | 11(0.64%)    |
| <b>DBP Trajectory Group</b> | 840(48.50%)       | 444(25.64%)            | 327(18.88%)                                      | 121(6.99%)                      | 1732(100%)   |
| eGFR ≥ 90                   | 599(71.31%)       | 303(68.24%)            | 222(67.89%)                                      | 83(68.60%)                      | 1207(69.69%) |
| 60 ≤ eGFR < 90              | 237(28.21%)       | 138(31.08%)            | 104(31.80%)                                      | 35(28.93%)                      | 514(29.68%)  |
| 30 ≤ eGFR < 60              | 4(0.48%)          | 3(0.68%)               | 1(0.31%)                                         | 3(2.48%)                        | 11(0.64%)    |
| <b>MAP Trajectory Group</b> | 674(38.91%)       | 788(45.50%)            | 158(9.12%)                                       | 112(6.47%)                      | 1732(100%)   |
| eGFR ≥ 90                   | 489(72.55%)       | 538(68.27%)            | 104(65.82%)                                      | 76(67.86%)                      | 1207(69.69%) |
| 60 ≤ eGFR < 90              | 184(27.30%)       | 243(30.84%)            | 53(33.54%)                                       | 34(30.36%)                      | 514(29.68%)  |
| 30 ≤ eGFR < 60              | 1(0.15%)          | 7(0.89%)               | 1(0.63%)                                         | 2(1.79%)                        | 11(0.64%)    |

**Online Table 10. Number and percentage of subjects with subclinical renal damage in BP trajectory groups**

|                               | Low-Stable  | Moderate-Stable | High- Stable<br>(OR Low-<br>Increasing) | Moderate-<br>Increasing | Total       |
|-------------------------------|-------------|-----------------|-----------------------------------------|-------------------------|-------------|
| <b>SBP Trajectory Group</b>   | 535(30.78%) | 892(51.32%)     | 217(12.49%)                             | 94(5.41%)               | 1738(100%)  |
| 30≤eGFR < 60                  | 3(0.56%)    | 6(0.67%)        | 1(0.46%)                                | 1(1.06%)                | 11(0.63%)   |
| Positive uACR                 | 39(7.29%)   | 95(10.65%)      | 46(21.20%)                              | 41(43.62%)              | 221(12.72%) |
| 30≤eGFR < 60 or positive uACR | 42(7.85%)   | 98(10.99%)      | 47(21.66%)                              | 41(43.62%)              | 228(13.12%) |
| <b>DBP Trajectory Group</b>   | 844(48.56%) | 444(25.55%)     | 329(18.93%)                             | 121(6.96%)              | 1738(100%)  |
| 30≤eGFR < 60                  | 4(0.47%)    | 3(0.68%)        | 1(0.30%)                                | 3(2.48%)                | 11(0.63%)   |
| Positive uACR                 | 64(7.58%)   | 49(11.04%)      | 58(17.63%)                              | 50(41.32%)              | 221(12.72%) |
| 30≤eGFR < 60 or positive uACR | 67(7.94%)   | 52(11.71%)      | 58(17.63%)                              | 51(42.15%)              | 228(13.12%) |
| <b>MAP Trajectory Group</b>   | 678(39.01%) | 790(45.45%)     | 158(9.09%)                              | 112(6.44%)              | 1738(100%)  |
| 30≤eGFR < 60                  | 1(0.15%)    | 7(0.89%)        | 1(0.63%)                                | 2(1.79%)                | 11(0.63%)   |
| Positive uACR                 | 46(6.78%)   | 93(11.77%)      | 37(23.42%)                              | 45(40.18%)              | 221(12.72%) |
| 30≤eGFR < 60 or positive uACR | 47(6.93%)   | 98(12.41%)      | 37(23.42%)                              | 46(41.07%)              | 228(13.12%) |

eGFR, estimated glomerular filtration rate(mL/min/1.73m<sup>2</sup>) ; uACR, urinary albumin to creatinine ratio(mg/mmol).

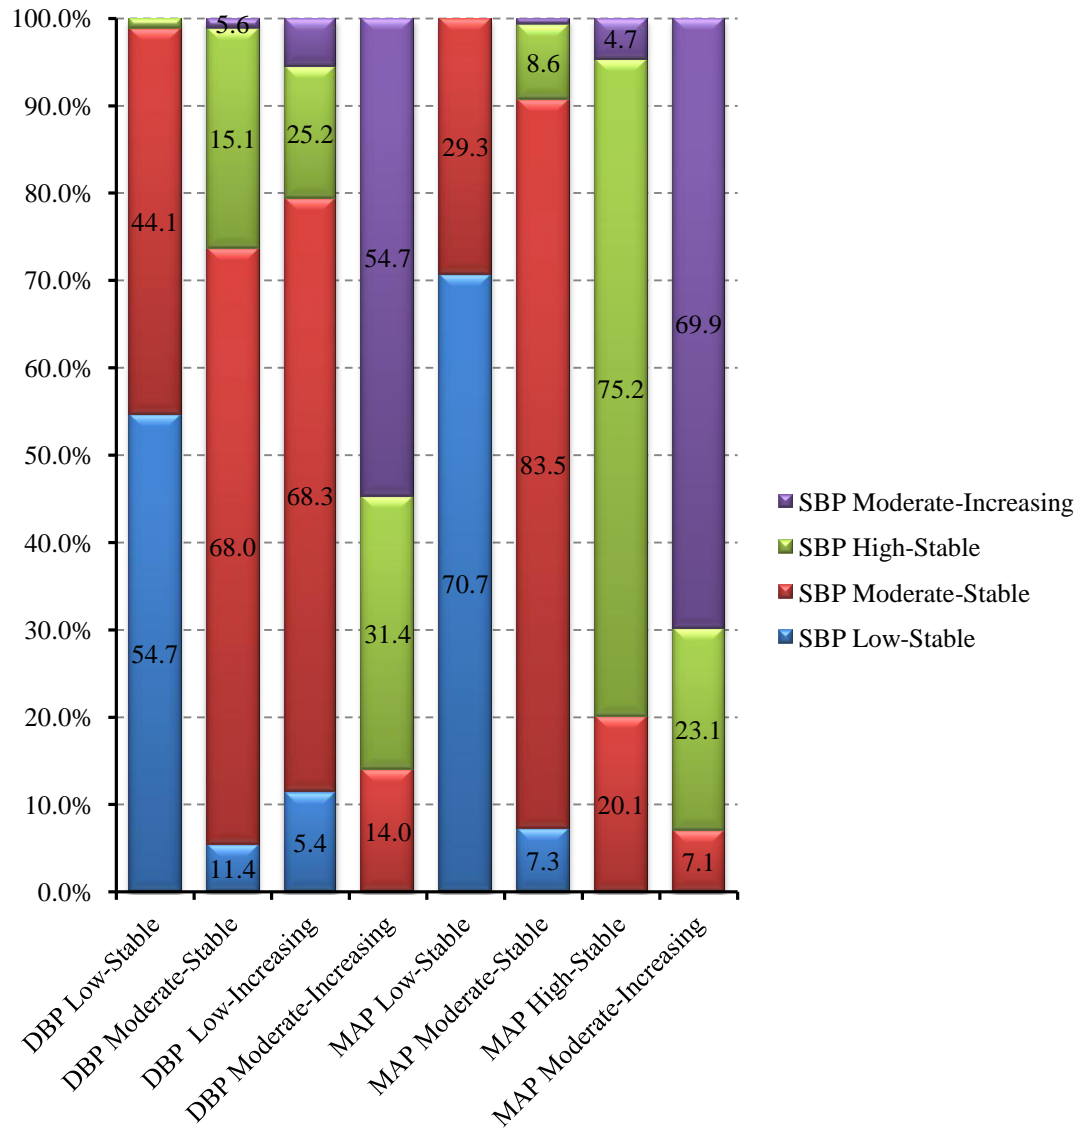

Online Figure 1. Percentage of SBP trajectories by DBP and MAP trajectory groups

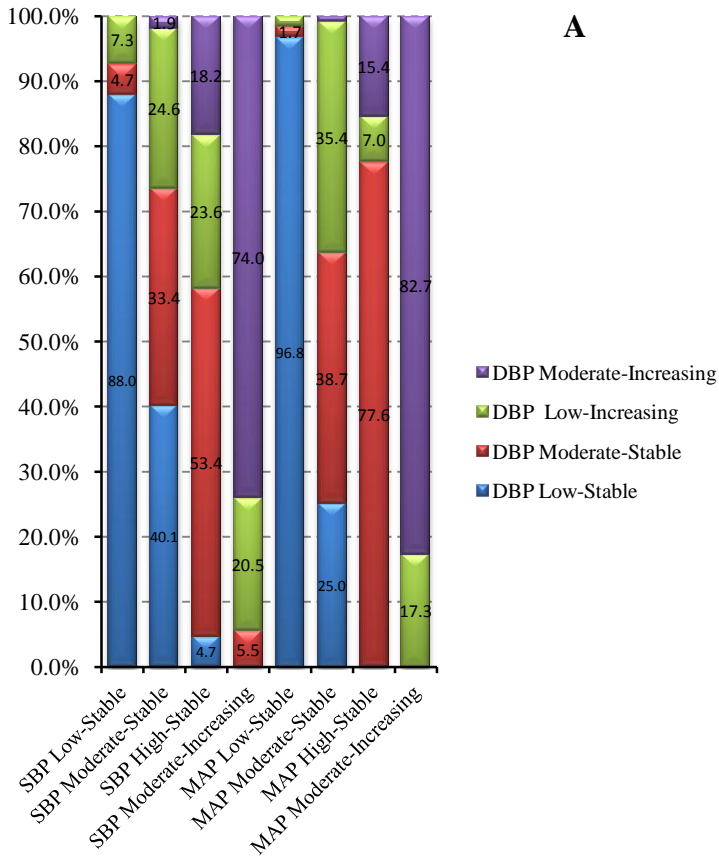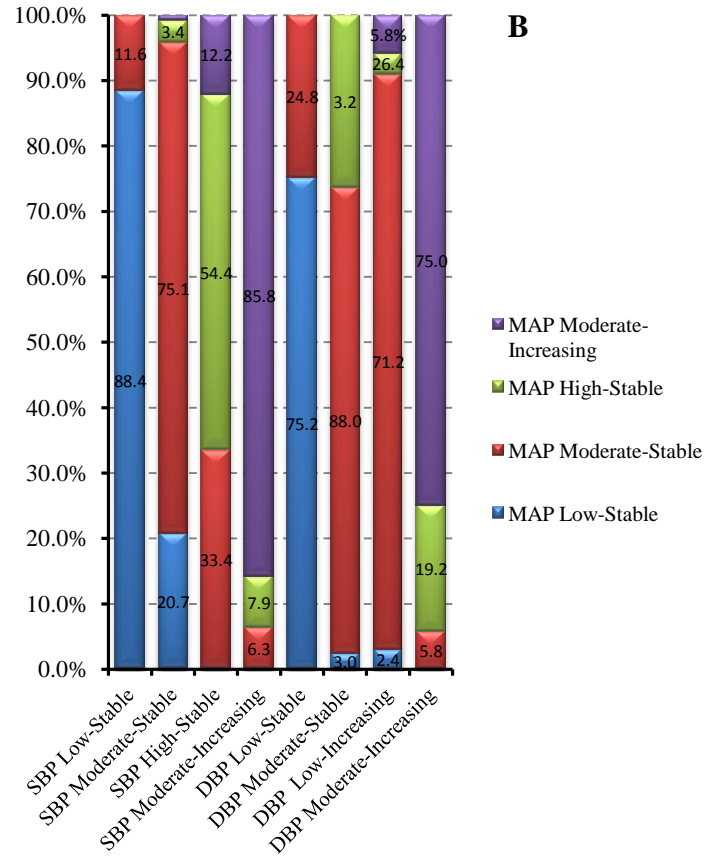

Online Figure 2. Percentage of DBP trajectories by SBP and MAP trajectory groups(A) and the percentage of MAP trajectories by SBP and DBP trajectory

### A Systolic Blood Pressure

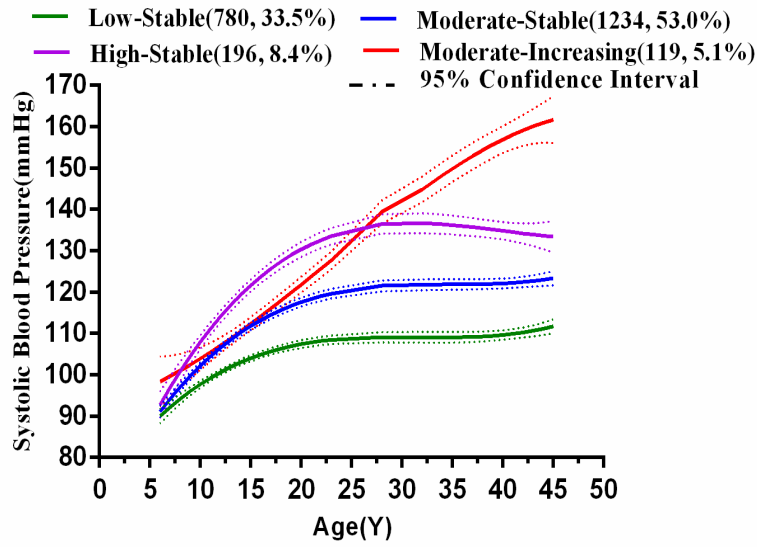

### B Diastolic Blood Pressure

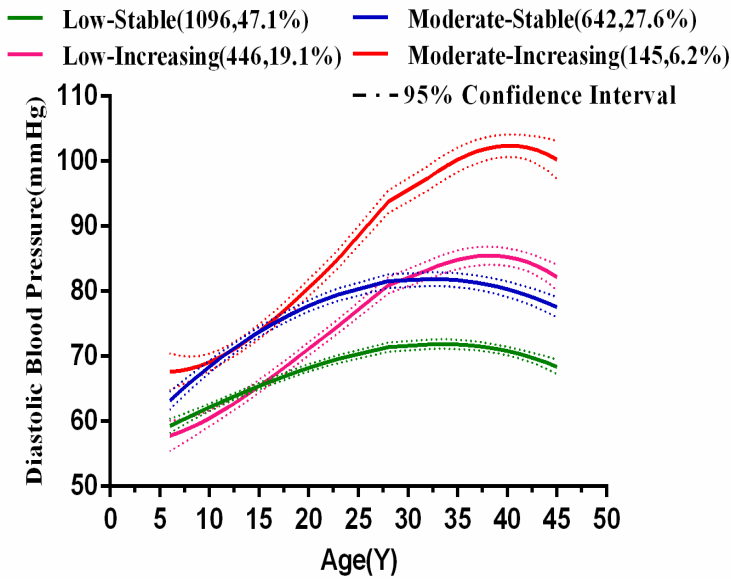

### C Mean Arterial Pressure

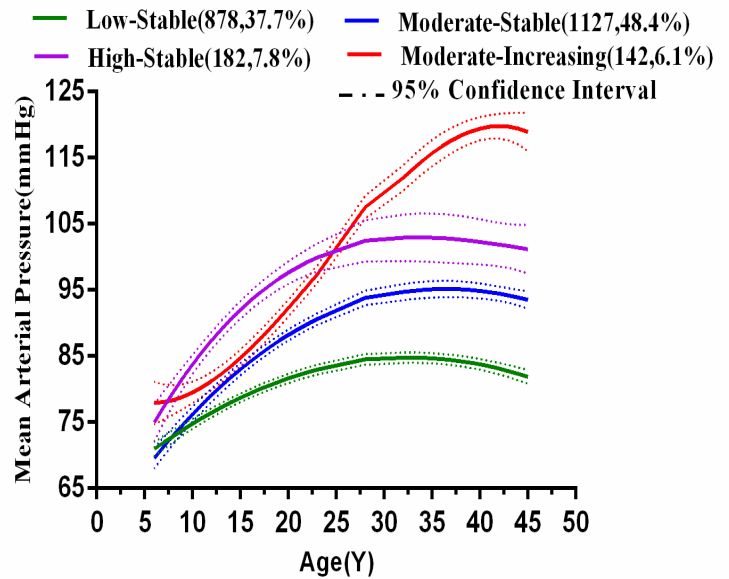

**Online Figure 3. Trajectories in SBP(A) , DBP(B) and MAP(C) in the Hanzhong Adolescent Hypertension Cohort (sensitivity analysis)**
